# Supplementary material
Source: publisher site journal article supplement (https://www.dovepress.com/article/258602)
Supplement: Supplementary file 1 [file get_supplementary_file.php]

Supplementary Table 2. DNIC expression after systemic drug application. Listed by the drug.

| PMID     | CONDITION           | DRUG                                                               | INJECTION SITE                                      | ANAESTHESIA | READOUT | DNIC EXPRESSION BEFORE DRUG | DNIC EXPRESSION AFTER DRUG                 | PHARMACOLOGY                                                                             |
|----------|---------------------|--------------------------------------------------------------------|-----------------------------------------------------|-------------|---------|-----------------------------|--------------------------------------------|------------------------------------------------------------------------------------------|
| 6260285  | Naïve               | Naloxone                                                           | Systemic (i.v.)                                     | N/A         | Beh     | Expressed                   | Not expressed                              | Opioid receptor antagonist                                                               |
| 6257327  | Naïve               | Naloxone                                                           | Systemic (i.v.)                                     | Halothane   | Eph     | Expressed                   | Not expressed                              | Opioid receptor antagonist                                                               |
| 2247225  | Naïve               | Naloxone                                                           | Systemic (i.v.)                                     | Halothane   | Eph     | Expressed                   | Not expressed                              | Opioid receptor antagonist                                                               |
| 27178898 | Naïve               | Naloxone                                                           | Systemic (i.p.)                                     | N/A         | Beh     | Expressed                   | Not expressed                              | Opioid receptor antagonist                                                               |
| 20302612 | Naïve               | Naloxone                                                           | Systemic (i.p.)                                     | Halothane   | Beh     | Expressed                   | Not expressed                              | Opioid receptor antagonist                                                               |
| 21330219 | Muscle inflammation | Naloxone                                                           | Systemic (s.c.)                                     | N/A         | Beh     | Expressed                   | Not expressed                              | Opioid receptor antagonist                                                               |
| 27178898 | Naïve               | Naloxone                                                           | Intracerebroventricular (i.c.v.)                    | N/A         | Beh     | Expressed                   | Not expressed                              | Opioid receptor antagonist                                                               |
| 7260590  | Naïve               | Morphine + Naloxone                                                | Systemic (i.v.) + Systemic (i.v.)                   | Halothane   | Eph     | Expressed                   | Expressed                                  | MOR-DOR agonist + opioid receptor antagonist                                             |
| 3171978  | Naïve               | Morphine + Naloxone                                                | i.c.v. + Systemic (i.v.)                            | Halothane   | Eph     | Expressed                   | Expressed                                  | MOR-DOR agonist + opioid receptor antagonist                                             |
| 3378576  | Naïve               | Morphine + Naloxone                                                | i.c.v. + Systemic (i.v.)                            | Halothane   | Eph     | Expressed                   | Expressed                                  | MOR-DOR agonist + opioid receptor antagonist                                             |
| 1397003  | Naïve               | Morphine + Naloxone                                                | Systemic (i.v.) + Systemic (i.v.)                   | Halothane   | Eph     | Expressed                   | Expressed                                  | MOR-DOR agonist + opioid receptor antagonist                                             |
| 23843537 | Naïve               | Naloxone + DAMGO                                                   | Systemic (i.v.) + i.th.                             | Halothane   | Eph     | Expressed                   | Expressed                                  | Opioid receptor antagonist + MOR agonist                                                 |
| 23843537 | Naïve               | Naltrindole + Deltorphin II                                        | Systemic (i.v.) + i.th.                             | Halothane   | Eph     | Expressed                   | Expressed                                  | DOR antagonist + DOR agonist                                                             |
| 7260590  | Naïve               | Morphine                                                           | Systemic (i.v.)                                     | Halothane   | Eph     | Expressed                   | Not expressed                              | MOR-DOR agonist                                                                          |
| 1397003  | Naïve               | Morphine                                                           | Systemic (i.v.)                                     | Halothane   | Eph     | Expressed                   | Not expressed                              | MOR-DOR agonist                                                                          |
| 1397003  | PAG lesion          | Morphine                                                           | Systemic (i.v.)                                     | Halothane   | Eph     | Expressed                   | Expressed                                  | MOR-DOR agonist                                                                          |
| 20016098 | Naïve               | Morphine sulfate                                                   | Subcutaneous pellets                                | Urethane    | Eph     | Expressed                   | Not expressed                              | MOR-DOR agonist                                                                          |
| 20016098 | Naïve               | Morphine sulfate                                                   | Subcutaneous osmotic minipumps                      | Urethane    | Eph     | Expressed                   | Not expressed                              | MOR-DOR agonist                                                                          |
| 21929659 | Naïve               | Morphine sulfate                                                   | Subcutaneous pellets                                | Urethane    | IHC     | Expressed                   | Not expressed                              | MOR-DOR agonist                                                                          |
| 29369967 | Naïve               | Morphine sulfate                                                   | Subcutaneous osmotic minipumps                      | N/A         | Beh     | Expressed                   | Expressed                                  | MOR-DOR agonist                                                                          |
| 30286616 | Naïve               | Morphine sulfate                                                   | Subcutaneous osmotic minipumps                      | N/A         | Beh     | Expressed                   | Not expressed                              | MOR-DOR agonist                                                                          |
| 3171978  | Naïve               | Morphine sulphate                                                  | Intracerebroventricular (i.c.v.)                    | Halothane   | Eph     | Expressed                   | Not expressed                              | MOR-DOR agonist                                                                          |
| 3378576  | Naïve               | Morphine base                                                      | Intracerebroventricular (i.c.v.)                    | Halothane   | Eph     | Expressed                   | Not expressed                              | MOR-DOR agonist                                                                          |
| 29369967 | BLS                 | nor-binaltorphimine                                                | Systemic (s.c.)                                     | N/A         | Beh     | Not expressed               | Expressed                                  | MOR agonist                                                                              |
| 30870321 | SNL                 | Nor-binaltorphimine                                                | Systemic (s.c.)                                     | N/A         | Beh     | Not expressed               | Expressed                                  | KOR antagonist                                                                           |
| 2986769  | Naïve               | ES 52                                                              | Systemic (i.v.)                                     | Halothane   | Eph     | Expressed                   | Expressed                                  | Inhibitor of enkephalinase (derivative of Thiorphan)                                     |
| 8750730  | Naïve               | Buprenorphine hydrochloride                                        | Systemic (i.v.)                                     | Halothane   | EMG     | Expressed                   | Not expressed                              | Partial MOR agonist                                                                      |
| 26010460 | SNL                 | Tapentadol                                                         | Systemic (s.c.)                                     | Isoflurane  | Eph     | Not expressed               | Expressed                                  | NRI and MOR agonist                                                                      |
| 30821870 | OA-MIA (late stage) | Tapentadol                                                         | Systemic (s.c.)                                     | Isoflurane  | Eph     | Not expressed               | Expressed                                  | NRI and MOR agonist                                                                      |
| 30461363 | OA-MIA (late stage) | Tapentadol                                                         | Systemic (s.c.)                                     | Isoflurane  | Eph     | Not expressed               | Expressed                                  | NRI and MOR agonist                                                                      |
| 30821870 | OA-MIA (late stage) | Tapentadol + Pregabalin                                            | Systemic (s.c.)                                     | Isoflurane  | Eph     | Not expressed               | Expressed                                  | NRI and MOR agonist + See below                                                          |
| 30821870 | OA-MIA (late stage) | Pregabalin                                                         | Systemic (s.c.)                                     | Isoflurane  | Eph     | Not expressed               | Not expressed                              | Blocker of voltage-gated calcium channels (VGCCs) that inhibits neurotransmitter release |
| 32315711 | PSNL                | Pregabalin                                                         | Orally administered (p.o.)                          | N/A         | Beh     | Not expressed               | Not expressed                              |                                                                                          |
| 32315711 | OA-MIA (late stage) | Pregabalin                                                         | Orally administered (p.o.)                          | N/A         | Beh     | Not expressed               | Not expressed                              |                                                                                          |
| 26010460 | SNL                 | Yohimbine                                                          | Systemic (s.c.)                                     | Isoflurane  | Eph     | Not expressed               | Not expressed                              | $\alpha_2$ -adrenoceptor antagonist                                                      |
| 32745472 | Naïve               | Atipamezole hydrochloride                                          | Systemic (s.c.)                                     | N/A         | Beh     | Expressed                   | Not expressed                              | $\alpha_2$ -adrenoceptor antagonist                                                      |
| 19697515 | Naïve               | Atipamezole hydrochloride + Dexmedetomidine hydrochloride          | Systemic (i.m.) + Systemic (i.v.)                   | Sevoflurane | EMG     | Expressed                   | Expressed                                  | $\alpha_2$ -adrenoceptor antagonist + $\alpha_2$ -adrenoceptor agonist                   |
| 19697515 | Naïve               | Phentolamine mesylate + Phenylephrine                              | Contralateral biceps femoris (i.m.)                 | Sevoflurane | EMG     | Expressed                   | Expressed                                  | $\alpha_{1/2}$ -adrenoceptor antagonist + $\alpha_1$ -adrenoceptor agonist               |
| 28700539 | Migraine model      | Propranolol                                                        | Oral gavage                                         | Halothane   | Eph     | Not expressed               | Expressed                                  | Non-selective $\beta$ -adrenoceptor antagonist                                           |
| 19697515 | Naïve               | Dexmedetomidine hydrochloride                                      | Systemic (i.v.)                                     | Sevoflurane | EMG     | Expressed                   | Not expressed                              | $\alpha_2$ -adrenoceptor agonist                                                         |
| 19697515 | Naïve               | Phenylephrine                                                      | Systemic (i.v.)                                     | Sevoflurane | EMG     | Expressed                   | Not expressed                              | $\alpha_1$ -adrenoceptor agonist                                                         |
| 6978166  | Naïve               | Metergoline                                                        | Systemic (i.v.)                                     | Halothane   | Eph     | Expressed                   | Not expressed                              | 5-HT <sub>2</sub> , 5-HT <sub>2c</sub> and 5-HT <sub>2b</sub> receptor antagonist        |
| 6976820  | Naïve               | Cinanserin                                                         | Systemic (i.p.)                                     | N/A         | Beh     | Expressed                   | Expressed                                  | 5-HT <sub>2a</sub> and 5-HT <sub>2c</sub> receptor antagonist                            |
| 6978166  | Naïve               | Cinanserin                                                         | Systemic (i.v.)                                     | Halothane   | Eph     | Expressed                   | Not expressed                              | 5-HT <sub>2a</sub> and 5-HT <sub>2c</sub> receptor antagonist                            |
| 6976820  | Naïve               | 5-hydroxytryptophan + cinanserin                                   | Systemic (i.p.)                                     | N/A         | Beh     | Expressed                   | Expressed                                  | Serotonin precursor + 5-HT <sub>2a</sub> and 5-HT <sub>2c</sub> receptor antagonist      |
| 6978166  | Naïve               | 5-hydroxytryptophan                                                | Systemic (i.v.)                                     | Halothane   | Eph     | Expressed                   | Expressed                                  | Serotonin precursor                                                                      |
| 6976820  | Naïve               | 5-hydroxytryptophan                                                | Systemic (i.p.)                                     | N/A         | Beh     | Expressed                   | Expressed                                  | Serotonin precursor                                                                      |
| 27891703 | SNL                 | Citalopram                                                         | Systemic (s.c.)                                     | Isoflurane  | Eph     | Not expressed               | Not expressed                              | SSRI                                                                                     |
| 27891703 | SNL                 | Fluoxetine                                                         | Systemic (s.c.)                                     | Isoflurane  | Eph     | Not expressed               | Not expressed                              | SSRI                                                                                     |
| 32315711 | OA MIA (late stage) | Duloxetine                                                         | Systemic (s.c.)                                     | N/A         | Beh     | Not expressed               | Expressed                                  | SNRI                                                                                     |
| 32315711 | PSNL                | Duloxetine                                                         | Systemic (s.c.)                                     | N/A         | Beh     | Not expressed               | Expressed                                  | SNRI                                                                                     |
| 32745472 | TBI                 | Duloxetine hydrochloride                                           | Systemic (s.c.)                                     | N/A         | Beh     | Not expressed               | Expressed                                  | SNRI                                                                                     |
| 32745472 | TBI                 | Reboxetine mesylate                                                | Systemic (i.p.)                                     | N/A         | Beh     | Not expressed               | Not expressed                              | NRI                                                                                      |
| 32745472 | TBI                 | 5,7-dihydroxytryptamine + Desipramine hydrochloride                | Intrathecal (i.t.) + Systemic (i.p.)                | N/A         | Beh     | Not expressed               | Not expressed                              | Neurotoxin depleting serotonergic fibers + TCA                                           |
| 32745472 | TBI                 | Escitalopram hydrochloride                                         | Systemic (s.c.)                                     | N/A         | Beh     | Not expressed               | Expressed                                  | SSRI                                                                                     |
| 32745472 | TBI                 | Escitalopram + Atipamezole                                         | Systemic (i.p.) + Systemic (s.c.)                   | N/A         | Beh     | Not expressed               | Expressed                                  | SSRI + $\alpha_2$ -adrenoceptor antagonist                                               |
| 32745472 | TBI                 | 5,7-dihydroxytryptamine + Desipramine hydrochloride + Escitalopram | Systemic (i.t.) + Systemic (i.p.) + Systemic (s.c.) | N/A         | Beh     | Not expressed               | Not expressed                              | Neurotoxin depleting serotonergic fibers + TCA + SSRI                                    |
| 30286616 | Naïve               | Sumatriptan succinate                                              | Subcutaneous osmotic minipumps                      | N/A         | Beh     | Expressed                   | Not expressed                              | 5-HT <sub>1</sub> receptor agonist                                                       |
| 32315711 | PSNL                | Celecoxib                                                          | Orally administered (p.o.)                          | N/A         | Beh     | Not expressed               | Not expressed                              | COX-2 inhibitor                                                                          |
| 32315711 | OA MIA (late stage) | Celecoxib                                                          | Orally administered (p.o.)                          | N/A         | Beh     | Not expressed               | Not expressed                              | COX-2 inhibitor                                                                          |
| 12818952 | Naïve               | Isoflurane                                                         | Gaseous (inhaled)                                   | Isoflurane  | Eph     | Expressed                   | Not expressed for isoflurane above 1.2 MAC | General anaesthetic                                                                      |

**Abbreviations:** SNL - spinal nerve ligation model; TBI - traumatic brain injury; OA MIA - monoiodoacetate model of osteoarthritis; PSNL - partial sciatic nerve ligation; BLS - bright light stress; PAG - periaqueductal grey; i.p. - intraperitoneal; i.th. - intrathecal (L4/L5 - lumbar 4/5); Beh - behaviour; Eph - *in vivo* electrophysiology; EMG - electromyography; IHC - immunohistochemistry; MAC - minimum alveolar anesthetic concentration; TCA - tricyclic antidepressant; SSRI - selective serotonin reuptake inhibitor; NRI - selective noradrenaline reuptake inhibitor; SNRI - selective serotonin-noradrenaline reuptake inhibitor; MOR -  $\mu$ -opioid receptor; KOR -  $\kappa$ -opioid receptor; DOR -  $\delta$ -opioid receptor; COX2 - cyclooxygenase 2.
